# Supplementary material for: Susceptibility of Diaphorina citri to Irradiation with UV-A and UV-B and the Applicability of the Bunsen–Roscoe Reciprocity Law
Source: MDPI journal article supplement (doi:10.3390/insects14050445), 2023-05-08
Supplement: s1 [file s1]

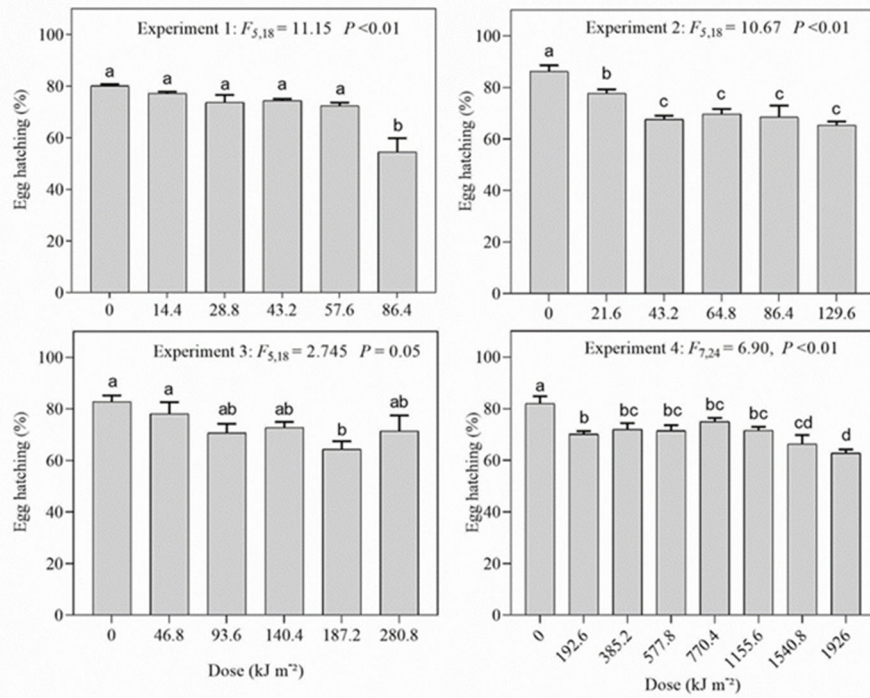

Figure S1. Effects of UV-A on the egg hatch of *D. citri*. In Expts. 1, 2, and 3, the eggs were exposed daily to 8, 12, and 26 W m<sup>-2</sup> for 30 to 180 min and, in Expt. 4 they were exposed at 107 W m<sup>-2</sup> for 30–300 min each day. The data are means ( $n = 4$ ; 24–185 eggs per replication), and the bars represent the standard errors. Means annotated with different letters are significantly different from each other according to Duncan's MRT tests at  $p = 0.05$ .

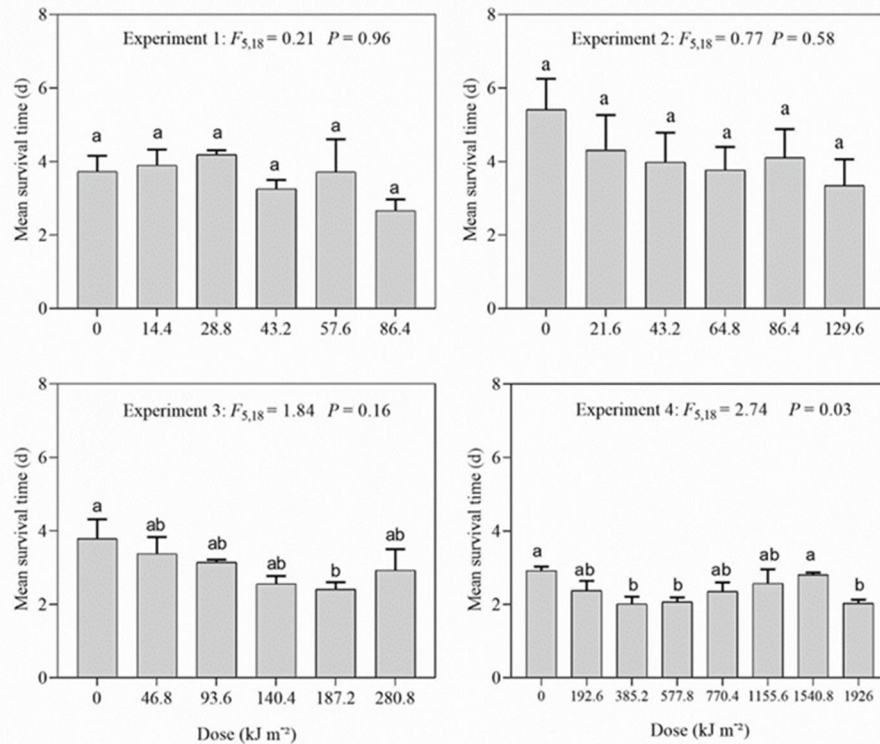

Figure S2. Effects of UV-A on survival of nymphs hatching from irradiated eggs of *D. citri*. In Expts. 1, 2, and 3, the eggs were exposed daily to 8, 12, and 26 W m<sup>-2</sup> for 30 to 180 min and, in Expt. 4, they were exposed at 107 W m<sup>-2</sup> for 30–300 min each day. The data are means ( $n = 4$ ; 10–133 eggs per replication), and the bars represent the standard errors. Means annotated with different letters are significantly different from each other according to Duncan's MRT tests at  $p = 0.05$ .

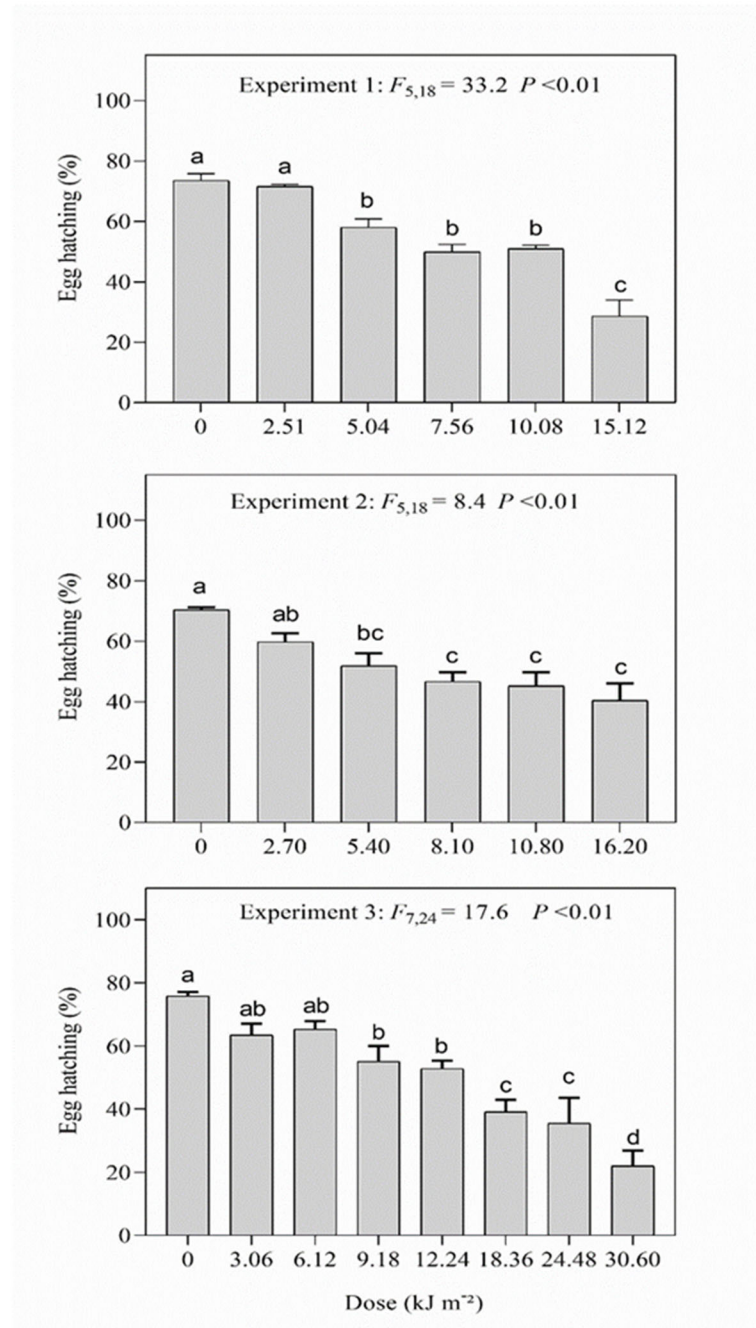

Figure S3. Effects of UV-B on egg hatching of *D. citri* following different exposure durations and intensities. In Expts. 1 and 2, the eggs were exposed daily to 1.4 and 1.5 W m<sup>-2</sup> for 30 to 180 min and, in Expt. 3, they were exposed at 1.7 W m<sup>-2</sup> for 30–300 min each day. The data are means ( $n = 4$ ; 20–100 eggs per replication), and the bars represent the standard errors. Means annotated with different letters are significantly different from each other according to Duncan's MRT tests at  $p = 0.05$ .

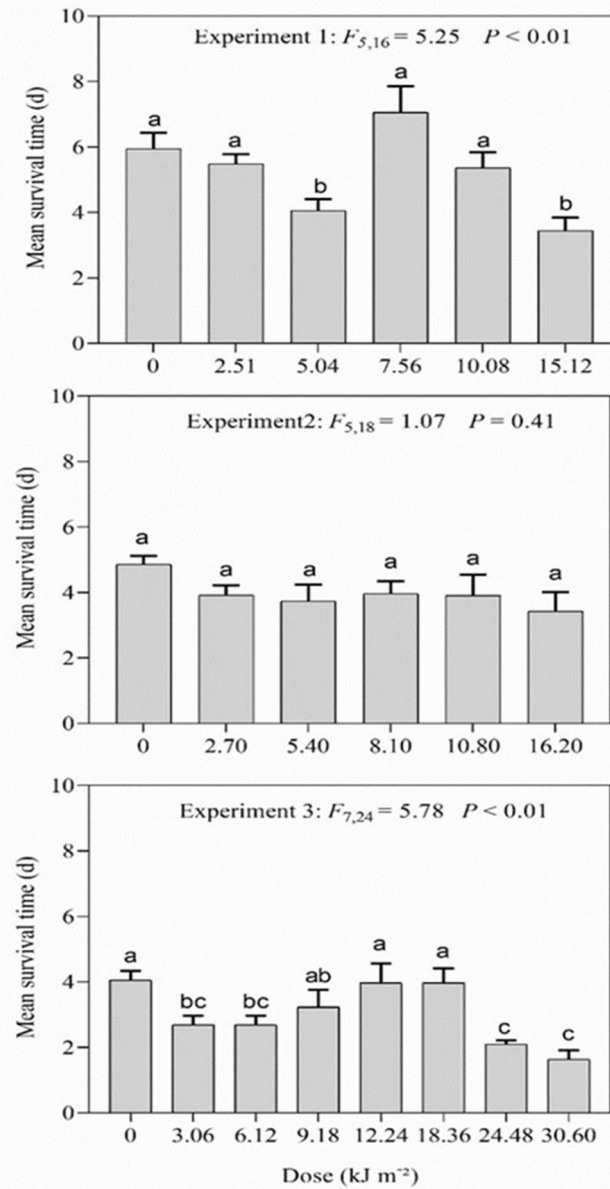

Figure S4. Effects of UV-B on survival of early nymphs that hatched from irradiated eggs. In Expts. 1 and 2, the eggs were exposed daily to 1.4 and 1.5 W m<sup>-2</sup> for 30 to 180 min and, in Expt. 3, they were exposed at 1.7 W m<sup>-2</sup> for 30–300 min each day. The data are means ( $n = 4$ ; 5–100 nymphs per replication), and the bars represent the standard errors. Means annotated with different letters are significantly different from each other according to Duncan's MRT tests at  $p = 0.05$ .

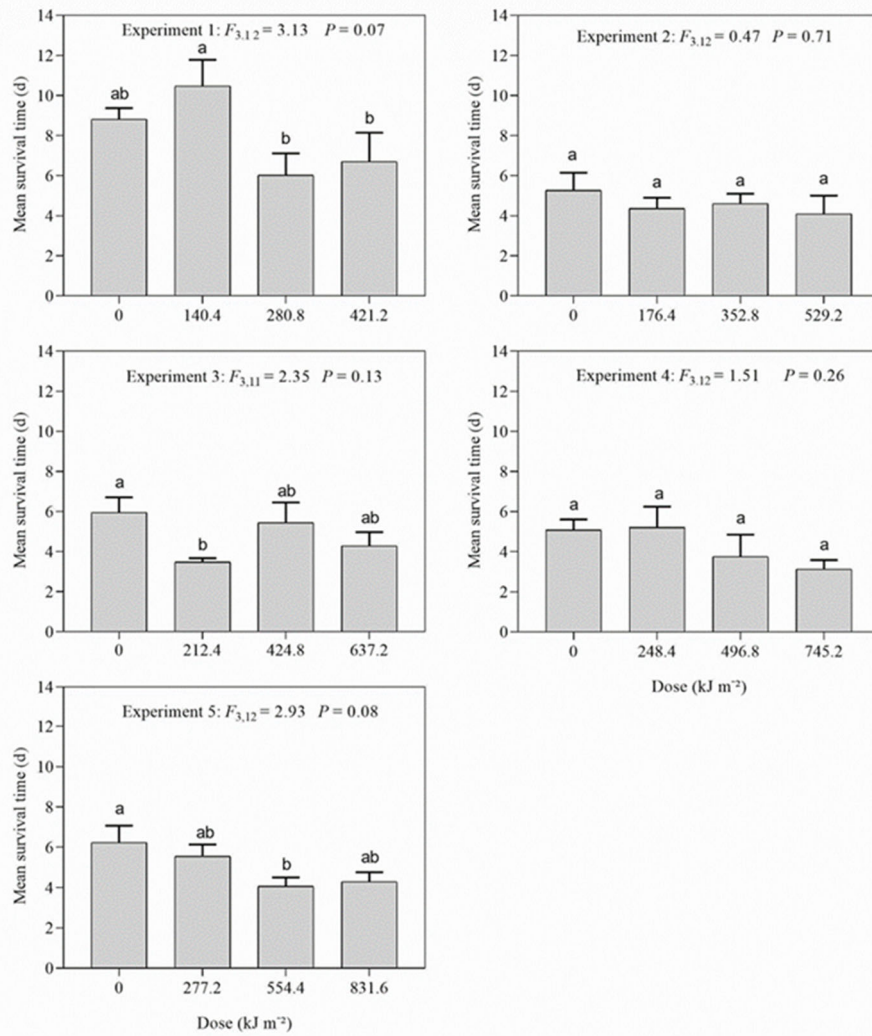

Figure S5. Effects of UV-A on survival of early instar nymphs of *D. citri* irradiated with UV-A. In Expts. 1, 2, 3, 4, and 5, the nymphs were, respectively, irradiated daily with 39, 49, 59, 69, and 77 W m<sup>-2</sup> for 60 to 180 min. The data are means ( $n = 4$ ; 20–100 nymphs per replication), and the bars represent the standard errors. Means annotated with different letters are significantly different from each other according to Duncan's MRT tests at  $p = 0.05$ .



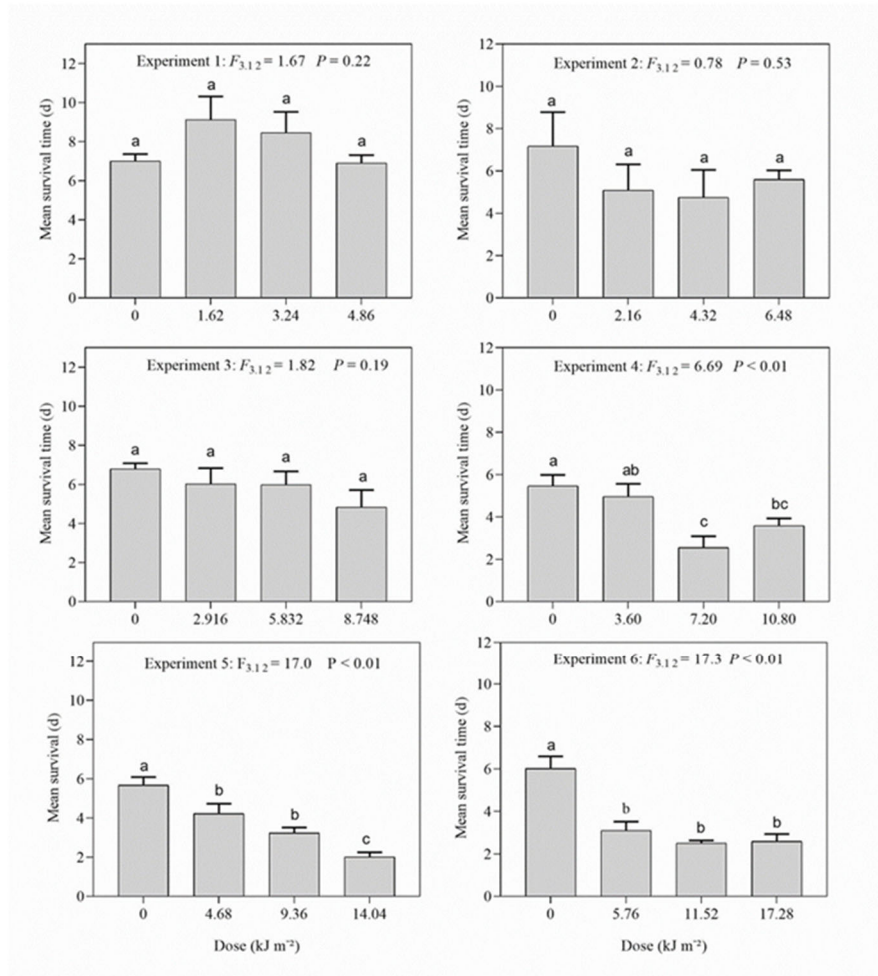

Figure S6. Effects of UV-B on survival of early instar nymphs of *D. citri* irradiated with UV-B. In the experiments the nymphs were irradiated daily at 0.45, 0.6, 0.81, 1, 1.3, and 1.6 W m<sup>-2</sup> for 60 or 180 min. The data are means ( $n = 4$ ; 20–100 nymphs per replication), and the bars represent the standard errors. Means annotated with different letters are significantly different from each other according to Duncan's MRT tests at  $p = 0.05$ .

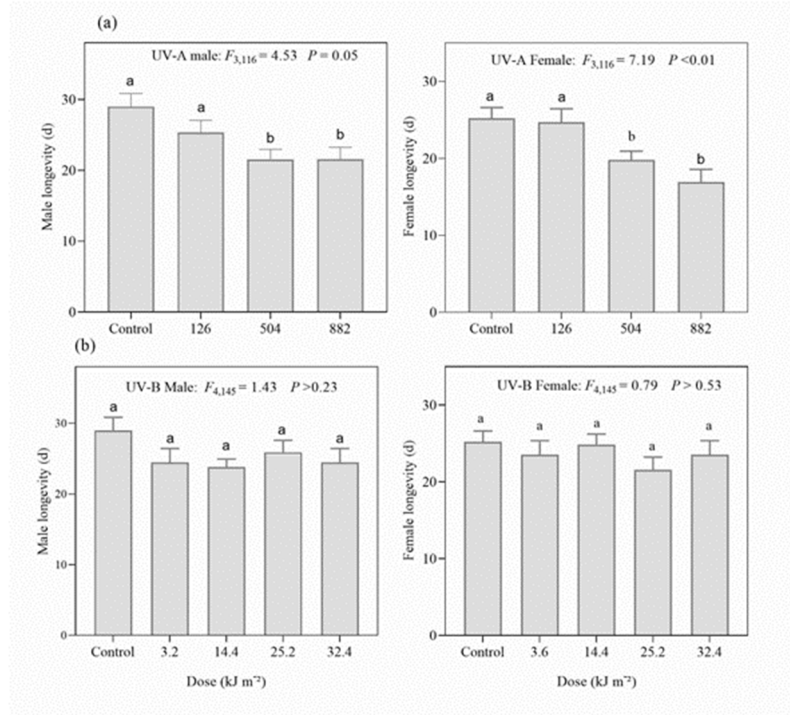

Figure S7. Effects of UV-A (a) and UV-B (b) on longevity of male and female adult *D. citri*. The adults were exposed daily to UV-A at  $35 \text{ W m}^{-2}$  for 1, 4, and 7 h or with UV-B at  $1 \text{ W m}^{-2}$  for 1, 4, 7, and 9 h each day until they died. The data are means ( $n = 30$ ), and the bars represent the standard errors. Means annotated with different letters are significantly different from each other according to Duncan's MRT tests at  $p = 0.05$ .

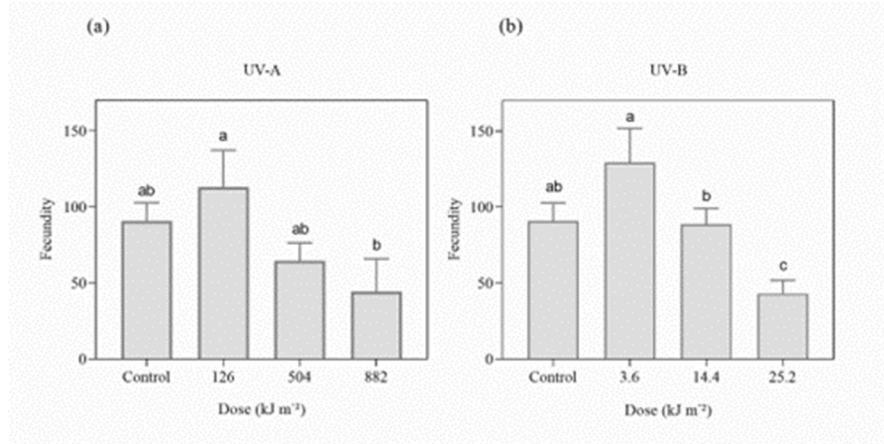

Figure S8. Effects of daily exposure to (a) UV-A at 35 W m<sup>-2</sup> for 0, 1, 4, and 7 h (b) and UV-B at 1 W m<sup>-2</sup> for 0, 1, 4, and 7 h on the fecundity of adult female *D. citri*; the insects were exposed until they died. The data are means (UV-A,  $n = 6-22$ ; UV-B,  $n = 7-27$ ), and the bars represent the standard errors. Means annotated with different letters are significantly different from each other according to Duncan's MRT tests at  $p = 0.05$ .

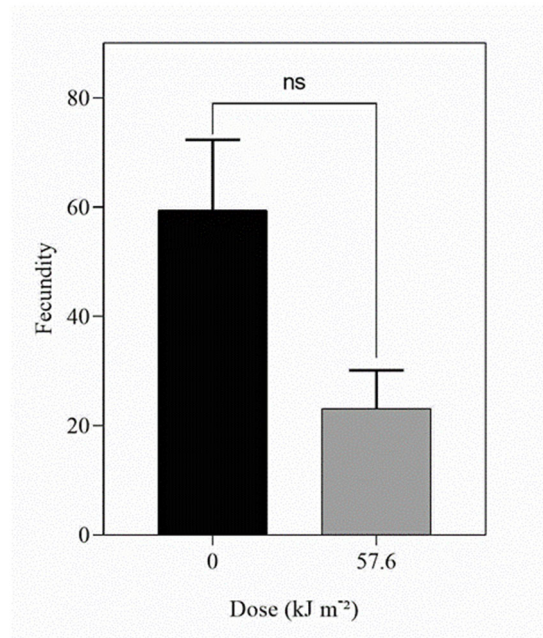

Figure S9. Effect of UV-B on the fecundity of female *D. citri* when treated for 16 h d<sup>-1</sup>. The data are means ( $n = 7-19$ ) and the bars represent the standard errors. Table S1. Effect of irradiation with UV-A on the F<sub>1</sub> generation. The data are means ( $n = 6-10$ ) and the bars represent the standard errors.



**Table S1.** Effect of irradiation with UV-A on the F<sub>1</sub> generation. The data are means (n = 6–10), and the bars represent the standard errors.

| Dose<br>(kJ m <sup>-2</sup> d <sup>-1</sup> ) | Egg Hatch (%)   | Nymphal Longevity *<br>(Days) | Duration for Adult<br>Eclosion (Days) |          |
|-----------------------------------------------|-----------------|-------------------------------|---------------------------------------|----------|
|                                               |                 |                               | Male                                  | Female   |
| 0                                             | 64.63 ± 2.66 a  | 5.50 ± 0.40 a                 | 20.60 a                               | 18.85 ab |
| 126                                           | 63.33 ± 6.58 a  | 4.69 ± 0.31 a                 | 19.50 a                               | 21.25 a  |
| 504                                           | 66.52 ± 3.50 a  | 5.66 ± 0.60 a                 | 19.28 a                               | 17.00 b  |
| 882                                           | 19.66 ± 10.08 b |                               |                                       |          |

Means annotated with different letters are significantly different from each other according to Duncan's MRT tests at  $p = 0.05$ . \* Irrespective of instar.

**Table S2.** Effect of irradiation with UV-B on the F<sub>1</sub> generation. The data are means (n = 10), and the bars represent the standard errors.

| Dose<br>(kJ m <sup>-2</sup> d <sup>-1</sup> ) | Egg Hatch (%)   | Nymphal Longevity *<br>(Days) | Duration until Adult<br>Eclosion (Days) |         |
|-----------------------------------------------|-----------------|-------------------------------|-----------------------------------------|---------|
|                                               |                 |                               | Male                                    | Female  |
| 0                                             | 64.63 ± 2.66 ab | 5.50 ± 0.40 ab                | 20.60 a                                 | 17.42 a |
| 3.6                                           | 60.85 ± 1.30 ab | 4.99 ± 0.36 b                 | 20.50 a                                 | 19.00 a |
| 14.4                                          | 69.47 ± 4.01 a  | 6.68 ± 0.80 a                 | 20.67 a                                 | 20.33 a |
| 25.2                                          | 60.03 ± 3.09 b  | 4.66 ± 0.22 b                 |                                         |         |

Means annotated with different letters are significantly different from each other according to Duncan's MRT tests at  $p = 0.05$ . \*Irrespective of instar.
